# Supplementary material
Source: PubMed Central journal article supplement (PMC6960354)
Supplement: NIHMS1063418-supplement-1.pdf [file NIHMS1063418-supplement-1.pdf]

**Supplementary Table 1:** Geometric means of biomarkers by smoking status in total control subjects

(n=5364), The Lung Cancer Cohort Consortium (LC3) Study

| <b>Biomarkers</b>        | <b>Current smokers</b> | <b>Former smokers</b> | <b>Never smokers</b> | <b>P value<sup>a</sup></b> |
|--------------------------|------------------------|-----------------------|----------------------|----------------------------|
| Tryptophan (μmol/L)      | 67.55                  | 66.45                 | 62.15                | < 0.0001                   |
| Kynurenine (μmol/L)      | 1.49                   | 1.64                  | 1.43                 | < 0.0001                   |
| KTRb                     | 22.09                  | 24.73                 | 23.08                | < 0.0001                   |
| Quinolinic acid (nmol/L) | 331.7                  | 416.2                 | 365.7                | < 0.0001                   |
| Neopterin (nmol/L)       | 10.54                  | 11.94                 | 10.87                | < 0.0001                   |

<sup>a</sup> for difference in geometric means among three smoking groups.

<sup>a</sup>KTR: Kynurenine: tryptophan ratio (x 1000).

**Supplementary Table 2** Median (20<sup>th</sup>-80<sup>th</sup> percentiles) of circulating biomarker concentrations among control subjects from different cohorts, The Lung Cancer Cohort Consortium (LC3) Study

| <b>Cohorts by Region</b> | <b>N</b> | <b>Tryptophan, (μmol/L)</b> | <b>Kynurenine, (μmol/L)</b> | <b>Kynurenine/ Tryptophan Ratio</b> | <b>Quinolinic acid (nmol/L)</b> | <b>Neopterin (nmol/L)</b> |
|--------------------------|----------|-----------------------------|-----------------------------|-------------------------------------|---------------------------------|---------------------------|
| <b>US cohorts</b>        |          |                             |                             |                                     |                                 |                           |
| CLUE I & II              | 191      | 68.3 (57.2-80.7)            | 1.58 (1.29-1.88)            | 22.9 (19.3-27.6)                    | 353 (278-468)                   | 13.6 (10.3-19.5)          |
| CPS-II                   | 182      | 71.6 (60.4-86.8)            | 1.81 (1.47-2.16)            | 24.5 (20.7-30.6)                    | 454 (340-614)                   | 9.71 (7.60-12.9)          |
| HPFS                     | 155      | 67.4 (60.0-77.3)            | 1.64 (1.37-1.92)            | 23.9 (20.3-29.9)                    | 362 (273-497)                   | 9.34 (6.87-12.2)          |
| MEC                      | 174      | 67.6 (57.9-79.2)            | 1.63 (1.40-1.92)            | 24.2 (20.6-28.7)                    | 383 (283-534)                   | 17.3 (13.3-22.3)          |
| NHS                      | 345      | 69.3 (58.7-81.0)            | 1.52 (1.29-1.80)            | 21.7 (18.4-27.5)                    | 349 (261-475)                   | 13.6 (10.5-18.1)          |
| NYUWHS                   | 171      | 66.0 (57.8-77.5)            | 1.44 (1.23-1.84)            | 22.3 (19.2-26.3)                    | 331 (250-430)                   | 14.0 (11.0-18.4)          |
| PHS                      | 81       | 64.2 (57.2-71.3)            | 1.60 (1.37-1.83)            | 25.0 (21.8-29.1)                    | 397 (324-521)                   | 7.16 (5.85-9.86)          |
| PLCO                     | 450      | 64.7 (53.2-78.8)            | 1.68 (1.35-2.05)            | 25.1 (21.1-31.3)                    | 433 (317-598)                   | 12.4 (8.84-17.2)          |
| SCCS                     | 226      | 54.6 (45.6-65.5)            | 1.24 (1.05-1.46)            | 22.5 (18.2-27.3)                    | 325 (232-473)                   | 8.83 (7.03-13.2)          |
| WHI                      | 241      | 51.3 (45.7-57.7)            | 1.28 (1.07-1.55)            | 24.8 (20.9-29.9)                    | 308 (244-412)                   | 13.4 (9.33-17.7)          |
| WHS                      | 184      | 68.7 (59.4-79.3)            | 1.50 (1.24-1.83)            | 22.0 (18.7-26.0)                    | 363 (280-494)                   | 6.66 (4.72-8.82)          |
| <b>EU/AU cohorts</b>     |          |                             |                             |                                     |                                 |                           |
| ATBC                     | 200      | 76.1 (65.7-86.8)            | 1.62 (1.37-1.93)            | 21.5 (19.0-24.2)                    | 367 (291-453)                   | 12.9 (10.3-16.6)          |
| HUNT                     | 193      | 73.7 (63.1-84.0)            | 1.59 (1.38-1.92)            | 22.0 (18.8-27.2)                    | 319 (244-449)                   | 9.51 (6.29-13.7)          |
| MCCS                     | 354      | 68.6 (59.7-78.1)            | 1.54 (1.28-1.81)            | 22.2 (18.8-26.4)                    | 345 (274-451)                   | 11.2 (8.81-14.1)          |
| MDCS                     | 198      | 63.2 (55.9-74.1)            | 1.40 (1.16-1.71)            | 21.8 (18.5-27.0)                    | 324 (245-422)                   | 10.7 (7.51-14.3)          |
| NSHDS                    | 244      | 61.9 (58.7-81.0)            | 1.41 (1.19-1.69)            | 22.7 (19.4-27.1)                    | 306 (241-407)                   | 5.89 (4.42-8.05)          |
| <b>Asian cohorts</b>     |          |                             |                             |                                     |                                 |                           |
| SCHS                     | 422      | 66.9 (56.9-77.7)            | 1.58 (1.34-1.89)            | 24.0 (20.1-28.0)                    | 365 (285-472)                   | 16.9 (13.2-21.9)          |
| SCS                      | 513      | 75.4 (64.8-86.2)            | 1.53 (1.30-1.81)            | 20.3 (17.7-23.7)                    | 331 (263-422)                   | 10.8 (8.36-14.3)          |
| SMHS                     | 421      | 64.4 (56.6-73.6)            | 1.43 (1.24-1.68)            | 22.1 (19.1-26.8)                    | 343 (267-455)                   | 8.53 (6.13-11.9)          |
| SWHS                     | 419      | 64.2 (56.3-73.1)            | 1.38 (1.18-1.64)            | 21.7 (18.5-25.5)                    | 363 (296-460)                   | 8.28 (6.37-11.8)          |

US: United States; WHI: The Women's Health Initiative; SCCS: The Southern Community Cohort Study; NYUWHS: The New York University Women's Health Study; CPS-II: The American Cancer Society Cancer Prevention Study-II Nutrition Cohort; CLUE I: The Campaign Against Cancer and Stroke; CLUE II: The Campaign Against Cancer Heart Disease; MEC: The Multiethnic Cohort; WHS: Women's Health Study; PHS: Physician's Health Study; NHS: The Nurses' Health Study; HPFS: Health Professional's Follow-up Study; EU: European; AU: Australian; MCCS: The Melbourne Collaborative Cohort Study; MDCS: The Malmö Diet and Cancer Study; NSHDS: The Northern Sweden Health and Disease Study; ATBC: The Alpha-Tocopherol, Beta-Carotene Cancer Prevention Study; HUNT: The Nørd-Trøndelag Health Study; SMHS: The Shanghai Men's Health Study; SWHS: The Shanghai Women's Health Study; SCHS: The Singapore Chinese Health Study; SCS: The Shanghai Cohort Study.

**Supplemental Table 3:** Age-sex-adjusted pairwise Spearman correlation coefficients<sup>a</sup> between two circulating biomarkers among all control subjects (n=5364),  
The Lung Cancer Cohort Consortium (LC3) Study

| Biomarkers       | Kynurenine | KTR <sup>a</sup> | Neopterin          | Quinolinic acid |
|------------------|------------|------------------|--------------------|-----------------|
| Tryptophan       | 0.45       | -0.43            | -0.01 <sup>b</sup> | 0.13            |
| Kynurenine       |            | 0.55             | 0.34               | 0.66            |
| KTR <sup>a</sup> |            |                  | 0.35               | 0.53            |
| Neopterin        |            |                  |                    | 0.34            |

<sup>c</sup> KTR, Kynurenine to tryptophan ratio (x 1000).

<sup>a</sup> P > 0.05 for this and P < 0.001 for all other correlation coefficients.
